# Supplementary material
Source: publisher figshare collection journal article supplement (https://gsajournals.figshare.com/ndownloader/files/21191826)
Supplement: Supplementary file 1 [file 21191826]

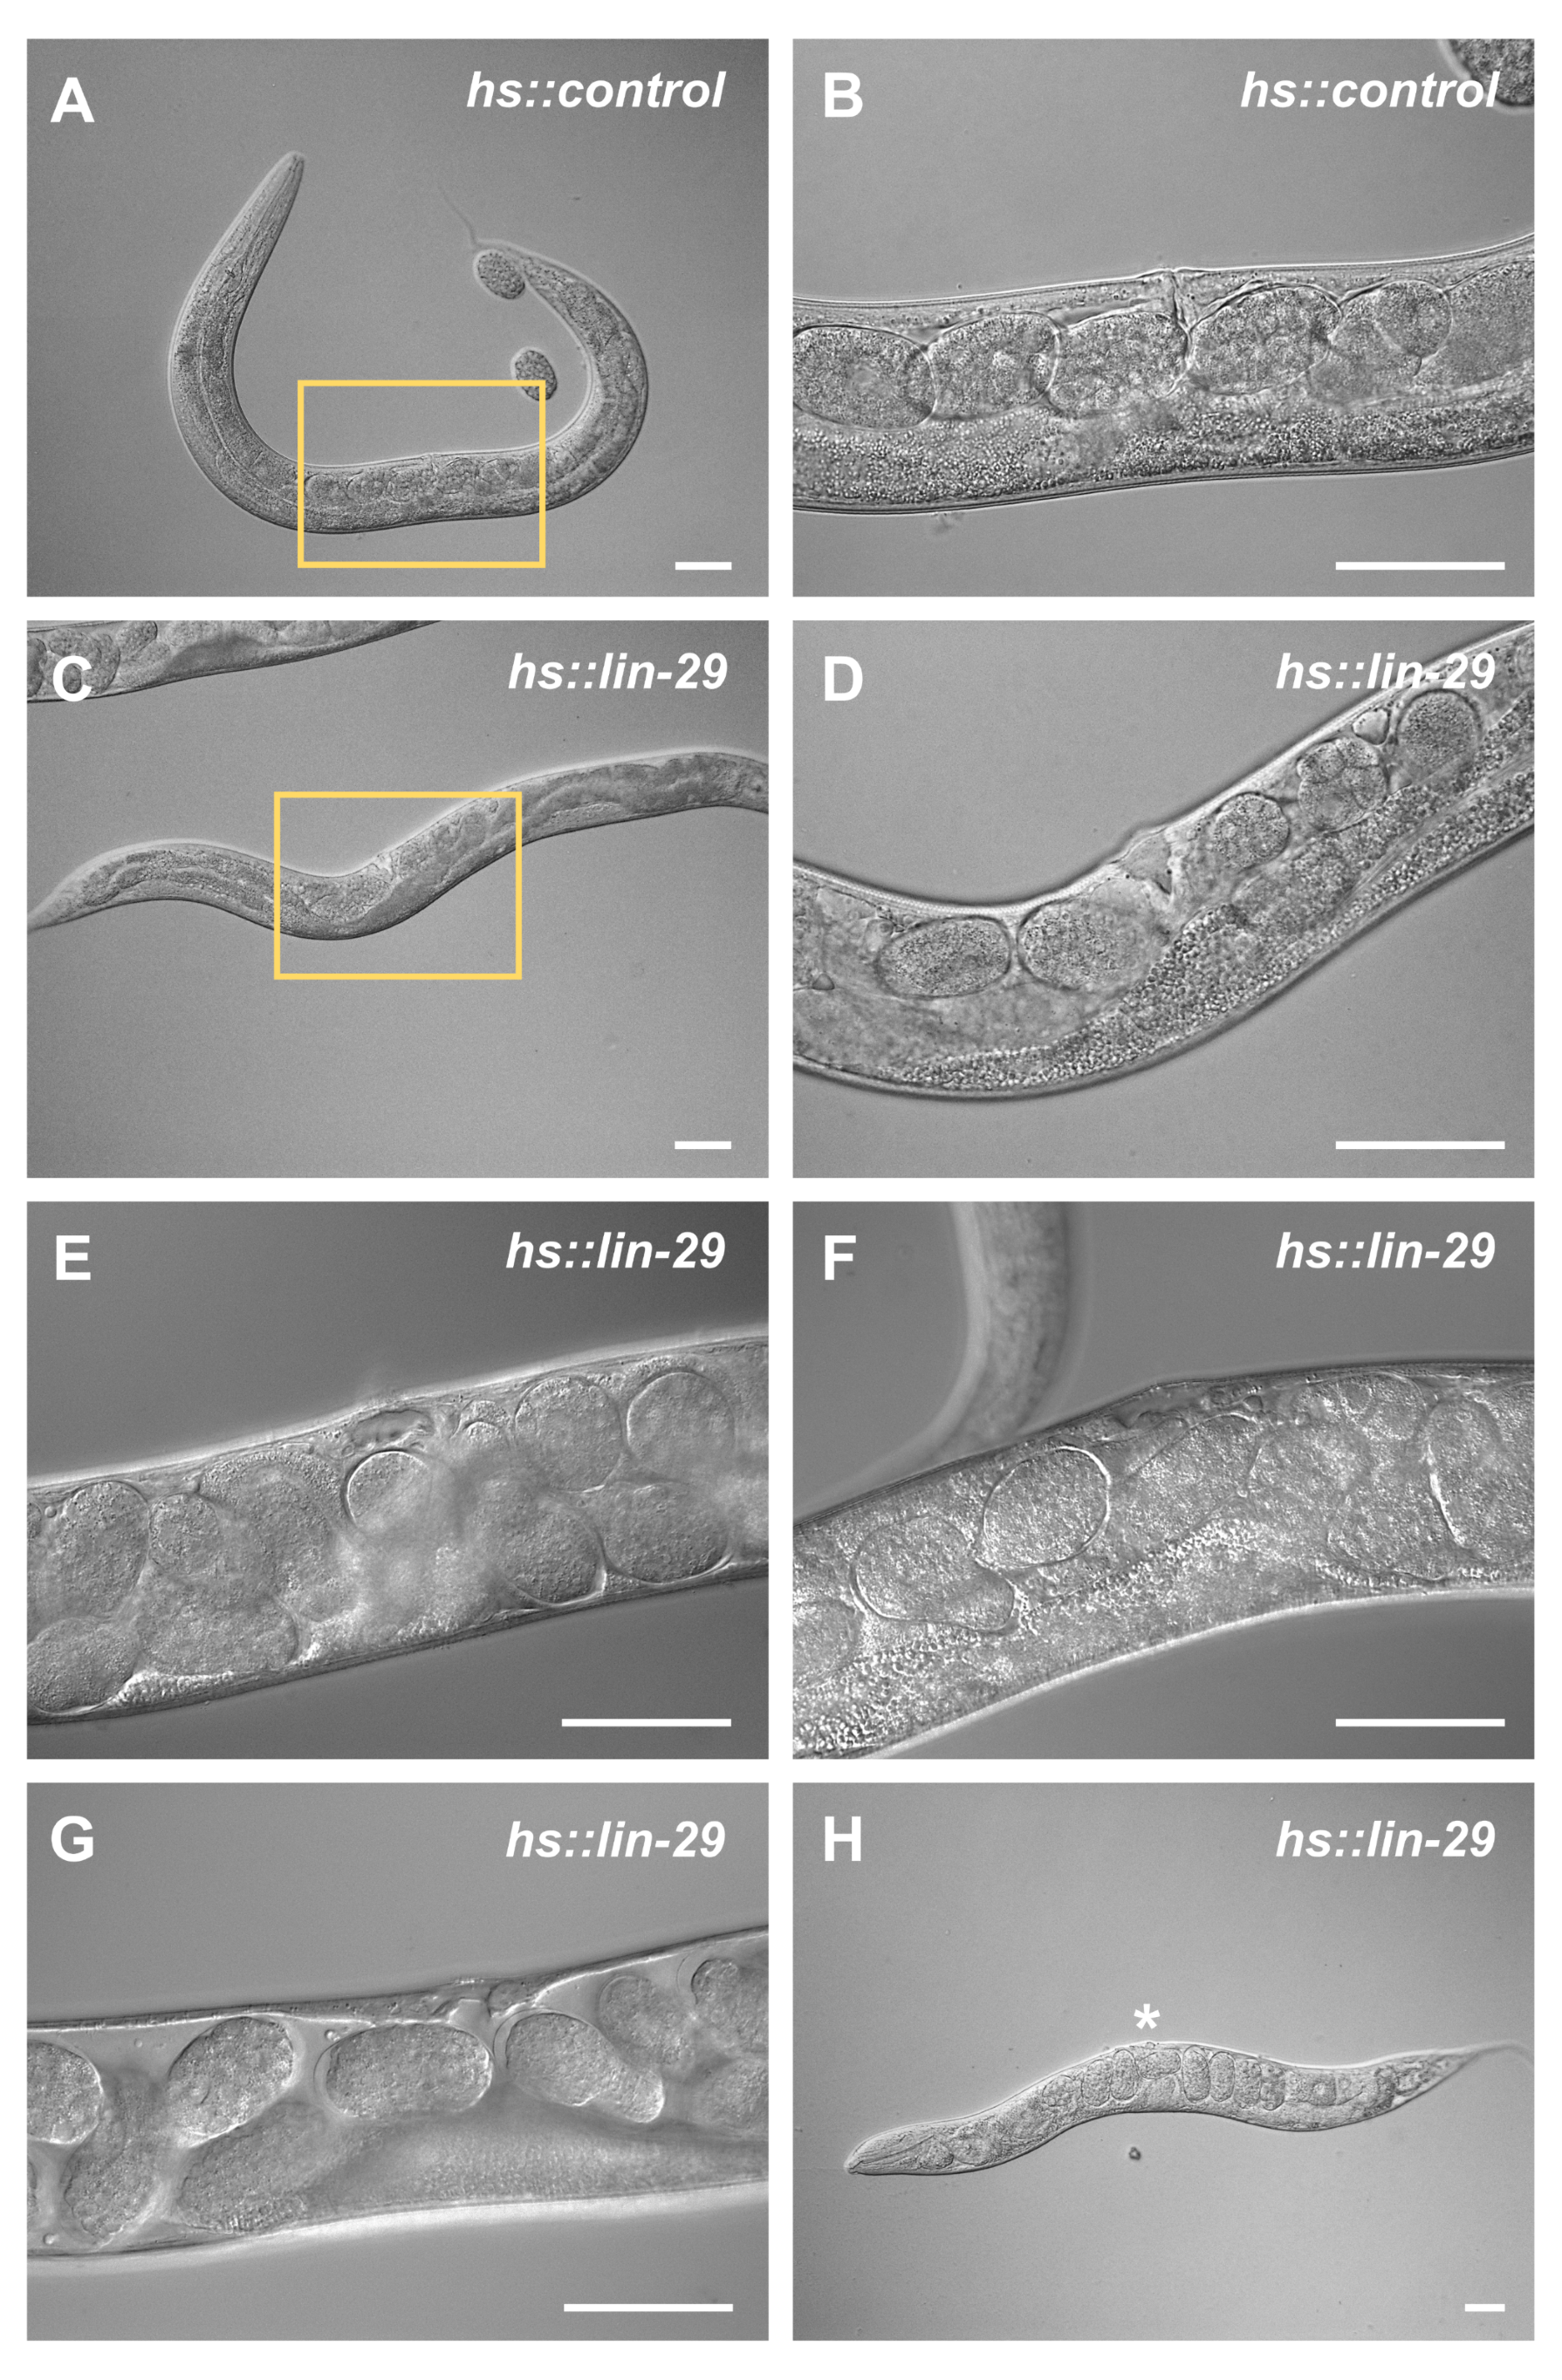


**Figure S1. Early misexpression of LIN-29 causes vulva development to arrest in the L4 stage.** *hs::control* (A, B) and *hs::lin-29*(C-H) animals were given a single heat shock pulse in the early L3 stage and examined as early gravid adults. (B) and (D) are insets from indicated regions of panels (A) and (C) respectively. (C, D) Non-Small animal with a ‘Christmas tree’ vulva morphology in an adult body (note presence of embryos). This vulval morphology is similar to that seen in wild animals at the L4 stage. (E, F) Adult animals with an abnormal vulva morphology, but still characteristic of an L4 stage. (G) Adult animal with an ‘underinduced’ vulval morphology, but still characteristic of an L4 stage. (H) Small animals with an abnormal vulval morphology indicated by an asterisk. Scale bar: 50µm.
